# Supplementary material for: Biodiversity management of organic farming enhances agricultural sustainability
Source: PubMed Central journal article supplement (PMC4817119; doi:10.1038/srep23816), 2016-04-01
Supplement: srep23816-s1.pdf [file srep23816-s1.pdf]

1 **Biodiversity management of organic farming enhances**  
2 **agricultural sustainability**

3 Haitao Liu<sup>1,2</sup>, Jie Meng<sup>1</sup>, Wenjing Bo<sup>3</sup>, Da Cheng<sup>1</sup>, Yong Li<sup>4</sup>, Liyue Guo<sup>1</sup>, Caihong  
4 Li<sup>1</sup>, Yanhai Zheng<sup>1</sup>, Meizhen Liu<sup>1</sup>, Tangyuan Ning<sup>5</sup>, Guanglei Wu<sup>1</sup>, Xiaofan Yu<sup>1</sup>,  
5 Sufei Feng<sup>5</sup>, Tana Wuyun<sup>5</sup>, Jing Li<sup>1</sup>, Lijun Li<sup>1</sup>, Yan Zeng<sup>6</sup>, Shi V. Liu<sup>7</sup>, Gaoming  
6 Jiang<sup>1,5\*</sup>.

7 <sup>1</sup>State Key Laboratory of Vegetation and Environmental Change, Institute of Botany, The Chinese  
8 Academy of Sciences, Nanxincun 20, Xiangshan, 100093, Beijing, China.

9 <sup>2</sup>University of the Chinese Academy of Sciences, No.19, Yuquan Avenue, 100049, Beijing, PR China

10 <sup>3</sup>Research Center for Eco-Environmental Sciences, The Chinese Academy of Sciences, 18 Shuangqing  
11 Road, Haidian District, 100085, Beijing, China.

12 <sup>4</sup>Institute of Geographic Sciences and Natural Resources Research, The Chinese Academy of Sciences,  
13 11A, Datun Road, Chaoyang District, 100101, Beijing, China.

14 <sup>5</sup>State Key Laboratory of Crop Biology, Shandong Agricultural University, No. 61, Daizong Avenue,  
15 271018, Tai'an, China.

16 <sup>6</sup>Hongyi Organic Farm, 273300, Pingyi, China.

17 <sup>7</sup>Eagle Institute of Molecular Medicine, Apex, NC, USA.

18 \*Correspondence to: E-mail: [jgm@ibcas.ac.cn](mailto:jgm@ibcas.ac.cn)(G.M. Jiang)

19

20 **Supplementary Materials list:**

21 Supplementary Tables S1-S9

22 **Tables S1** Comparison of net benefits per unit area between Biodiversity Management  
23 of Organic Farming (BMOF) and chemical farming (CF).

| Content                                                  | BMOF   | CF    |
|----------------------------------------------------------|--------|-------|
| Crop land (ha)                                           | 6.7    | 8.7   |
| Apple orchard (ha)                                       | 0.3    | 0     |
| Cattle breeding land (ha)                                | 1.3    | 0     |
| Cash forest (ha)                                         | 0.4    | 0     |
| Total land (ha)                                          | 8.7    | 8.7   |
| 8-year average labor inputs (\$ ha <sup>-1</sup> )       | 1,763  | 974   |
| 8-year average total inputs (\$ ha <sup>-1</sup> )       | 24,596 | 5,251 |
| 8-year average total outputs (\$ ha <sup>-1</sup> )      | 36,489 | 7,186 |
| 8-year average total net benefits (\$ ha <sup>-1</sup> ) | 11,893 | 1,935 |
| Net benefits ratio of BMOF to CF (BMOF/ CF)              | 6.1    |       |

24

25 **Tables S2** Detailed list of crop inputs and outputs for Biodiversity Management of

26 Organic Farming (BMOF) and chemical farming (CF).

| <b>Details of Crop Inputs</b> |                                                 |                                                                                  |                                                  |                                               |              |
|-------------------------------|-------------------------------------------------|----------------------------------------------------------------------------------|--------------------------------------------------|-----------------------------------------------|--------------|
| <b>Content</b>                | <b>Details</b>                                  | <b>Price Schedules</b>                                                           | <b>BMOF<br/>Amount<br/>(\$ ha<sup>-1</sup>)</b>  | <b>CF<br/>Amount<br/>(\$ ha<sup>-1</sup>)</b> |              |
|                               | Transportation fare for organic fertilizer      | 3.23 \$ CAR <sup>-1</sup> *22.5 CAR<br>ha <sup>-1</sup>                          | 72.6                                             | 0.0                                           |              |
|                               | Rotary tillage fare before winter wheat seeding | Mechanical rotary<br>tillage, 121.05 \$ ha <sup>-1</sup>                         | 121.1                                            | 121.1                                         |              |
| <b>Machine</b>                | Fare for soil preparation and seeding           | 96.84 \$ ha <sup>-1</sup>                                                        | 96.8                                             | 96.8                                          |              |
|                               | Combine harvester for winter wheat              | 193.68 \$ ha <sup>-1</sup>                                                       | 193.7                                            | 193.7                                         |              |
|                               | Combine harvester for corn                      | 193.68 \$ ha <sup>-1</sup>                                                       | 193.7                                            | 193.7                                         |              |
|                               | Fare for corn thresher                          | 12.11 \$ ha <sup>-1</sup>                                                        | 12.1                                             | 12.1                                          |              |
|                               | Solar energy light-traps depreciation costs     | 322.8 \$ light <sup>-1</sup> , 1 light ha <sup>-1</sup> ,<br>5 years for 1 light | 64.6                                             | 0.0                                           |              |
|                               | <b>Sum</b>                                      |                                                                                  |                                                  | <b>755</b>                                    | <b>617</b>   |
| <b>Irrigation</b>             | Requirements for irrigation to government       | 217.89 \$ ha <sup>-1</sup> *2                                                    | <b>436</b>                                       | <b>436</b>                                    |              |
|                               | Composting                                      | 2 labor ha <sup>-1</sup> , 9.68 \$ labor <sup>-1</sup>                           | 19.4                                             | 19.4                                          |              |
|                               | Loading and tedding Organic fertilizer          | 15 labor ha <sup>-1</sup>                                                        | 145.3                                            | 0.0                                           |              |
|                               | Irrigation                                      | 9 labor ha <sup>-1</sup>                                                         | 87.1                                             | 87.1                                          |              |
|                               | Spray insecticide for winter wheat              | 4.5 labor ha <sup>-1</sup>                                                       | 0.0                                              | 43.6                                          |              |
|                               | Air baskets in wheat                            | 7.5 labor ha <sup>-1</sup>                                                       | 72.6                                             | 72.6                                          |              |
|                               | Corn artificial seeding                         | 18 labor ha <sup>-1</sup>                                                        | 174.3                                            | 174.3                                         |              |
|                               | Spray herbicide for corn                        | 7.5 labor ha <sup>-1</sup>                                                       | 0.0                                              | 72.6                                          |              |
| <b>Labor</b>                  | Spray insecticide for corn                      | 6 labor ha <sup>-1</sup>                                                         | 0.0                                              | 58.1                                          |              |
|                               | Drainage for corn                               | 4.5 labor ha <sup>-1</sup>                                                       | 43.6                                             | 43.6                                          |              |
|                               | Manual weeding                                  | 15 labor ha <sup>-1</sup>                                                        | 145.2                                            | 0.0                                           |              |
|                               | Corn harvest                                    | 18 labor ha <sup>-1</sup>                                                        | 174.4                                            | 174.4                                         |              |
|                               | Cleaning up cornstalk                           | 21 labor ha <sup>-1</sup>                                                        | 203.3                                            | 203.3                                         |              |
|                               | Peeling of corn                                 | 15 labor ha <sup>-1</sup>                                                        | 145.2                                            | 145.2                                         |              |
|                               | Corn threshing                                  | 2 labor ha <sup>-1</sup>                                                         | 19.4                                             | 14.5                                          |              |
|                               | Air baskets in corn                             | 3 labor ha <sup>-1</sup>                                                         | 29.1                                             | 29.1                                          |              |
|                               | <b>Sum</b>                                      |                                                                                  | 130 labor ha <sup>-1</sup>                       | <b>1,259</b>                                  | <b>1,138</b> |
|                               |                                                 | Cost for organic fertilizers                                                     | 75cube ha <sup>-1</sup> , 4.84\$ m <sup>-3</sup> | 363.2                                         | 0.0          |
| <b>Fertilizer</b>             | Cost for chemical fertilizers                   | 14.53 \$ for winter<br>wheat, 8.07 \$ for corn                                   | 0.0                                              | 338.9                                         |              |
|                               | <b>Sum</b>                                      |                                                                                  | <b>363</b>                                       | <b>339</b>                                    |              |
|                               | Pesticides for wheat seed dressing              | 30 bag ha <sup>-1</sup> , 0.4 \$ bag <sup>-1</sup>                               | 0.0                                              | 12.1                                          |              |
| <b>Pesticide</b>              | Wheat aphids pesticide                          | 15 bottle ha <sup>-1</sup> , 1.6 \$ bottle <sup>-1</sup>                         | 0.0                                              | 24.2                                          |              |
|                               | Herbicides for corn                             | 24.21 \$ ha <sup>-1</sup>                                                        | 0.0                                              | 24.2                                          |              |

|                                           |                            |                                                     |                           |                     |
|-------------------------------------------|----------------------------|-----------------------------------------------------|---------------------------|---------------------|
|                                           | Pesticides for corn borer  | 30 bag ha <sup>-1</sup> , 0.32 \$ bag <sup>-1</sup> | 0.0                       | 9.7                 |
| <b>Sum</b>                                |                            |                                                     | <b>0</b>                  | <b>70</b>           |
| <b>Seeds</b>                              | Cost for winter wheat seed | 0.48 \$ kg <sup>-1</sup> , 225 kg ha <sup>-1</sup>  | 109.0                     | 109.0               |
|                                           | Cost for corn seed         | 3.23 \$ kg <sup>-1</sup> , 30 kg ha <sup>-1</sup>   | 96.8                      | 96.8                |
| <b>Sum</b>                                |                            |                                                     | <b>206</b>                | <b>206</b>          |
| <b>Total</b>                              |                            |                                                     | <b>3,019</b>              | <b>2,806</b>        |
| <b>Details of Flour Production Inputs</b> |                            |                                                     |                           |                     |
|                                           | Details                    | BMOF (\$ kg <sup>-1</sup> )                         | CF (\$ kg <sup>-1</sup> ) | Extraction Rate (%) |
| <b>Flour</b>                              | Grinding wheat flour       | 0.023                                               | 0.023                     | 75                  |
| <b>Production</b>                         | Grinding corn flour        | 0.045                                               | 0.045                     | 60                  |
|                                           | Flour bag                  | 0.161                                               | 0.006                     |                     |
| <b>Details of Crop Outputs</b>            |                            |                                                     |                           |                     |
|                                           | Details                    | BMOF (\$ kg <sup>-1</sup> )                         | CF (\$ kg <sup>-1</sup> ) |                     |
| <b>Products</b>                           | Wheat flour price          | 1.62                                                | 0.52                      |                     |
| <b>Price</b>                              | Corn flour price           | 1.62                                                | 0.82                      |                     |
|                                           | Grain bran price           | 0.29                                                | 0.29                      |                     |

27

28 **TableS3.**Detailed list of apple orchard inputs and outputs for Biodiversity

29 Management of Organic Farming (BMOF).

| <b>Details of apple orchard Inputs</b>            |                                                          |                                                                                  |                                        |
|---------------------------------------------------|----------------------------------------------------------|----------------------------------------------------------------------------------|----------------------------------------|
| <b>Content</b>                                    | <b>Details</b>                                           | <b>Price Schedules</b>                                                           | <b>Amount<br/>(\$ ha<sup>-1</sup>)</b> |
| <b>Fertilizer</b>                                 | Costs for manure composts                                | 217.5 cube ha <sup>-1</sup> , 4.84 \$ m <sup>-3</sup>                            | 1,053                                  |
| <b>Sum</b>                                        |                                                          |                                                                                  | <b>1,053</b>                           |
| <b>Transportation</b>                             | Transportation fare for manure compost                   | 1.61 \$ car <sup>-1</sup> , 150 car ha <sup>-1</sup>                             | 242.1                                  |
| <b>fare</b>                                       | Transportation fare for biogas slurry                    | 12.9 \$ car <sup>-1</sup> , 9 car ha <sup>-1</sup>                               | 116.2                                  |
| <b>Sum</b>                                        |                                                          |                                                                                  | <b>358</b>                             |
| <b>Labor</b>                                      | Scrape old bark                                          | 7.5 labor ha <sup>-1</sup> , 9.68 \$ labor <sup>-1</sup>                         | 72.6                                   |
|                                                   | Pruning                                                  | 30 labor ha <sup>-1</sup>                                                        | 290.4                                  |
|                                                   | Clean up the branches on the ground                      | 15 labor ha <sup>-1</sup>                                                        | 145.2                                  |
|                                                   | Bagging                                                  | 75 labor ha <sup>-1</sup>                                                        | 726.0                                  |
|                                                   | Blossom and fruit thinning                               | 60 labor ha <sup>-1</sup>                                                        | 580.8                                  |
|                                                   | Irrigation                                               | 15 labor ha <sup>-1</sup>                                                        | 145.2                                  |
|                                                   | Bag removing                                             | 30 labor ha <sup>-1</sup>                                                        | 290.4                                  |
|                                                   | Harvest                                                  | 30 labor ha <sup>-1</sup>                                                        | 290.4                                  |
|                                                   | Pest control                                             | 90 labor ha <sup>-1</sup>                                                        | 871.2                                  |
|                                                   | Manure compost application                               | 165 labor ha <sup>-1</sup>                                                       | 1,597.2                                |
|                                                   | Weeds management                                         | 30 labor ha <sup>-1</sup>                                                        | 290.4                                  |
|                                                   | Planting <i>Duchesneaindica</i>                          | 7.5 labor ha <sup>-1</sup>                                                       | 72.6                                   |
| <b>Sum</b>                                        |                                                          | <b>690 labor ha<sup>-1</sup></b>                                                 | <b>6,680</b>                           |
| <b>Irrigation</b>                                 | Requirements for irrigation to government                | 217.89 \$ha <sup>-1</sup> *4                                                     | <b>872</b>                             |
|                                                   | lime sulphur                                             |                                                                                  | 113.5                                  |
|                                                   | burgundy mixture                                         | 115 \$ per time, 3 times                                                         | 345.0                                  |
|                                                   | Biogas slurry                                            | 36.3 \$ per time, 3 times                                                        | 108.9                                  |
| <b>Pest control</b>                               | sticky card                                              |                                                                                  | 145.3                                  |
|                                                   | Stem residue trap                                        |                                                                                  | 169.5                                  |
|                                                   | Solar energy light-traps depreciation costs<br>(5 years) | 322.8 \$ light <sup>-1</sup> , 9 light ha <sup>-1</sup> , 5<br>years for 1 light | 581.0                                  |
| <b>Sum</b>                                        |                                                          |                                                                                  | <b>1,463</b>                           |
| <b>Electricity</b>                                | Pesticide spray                                          | 0.1 \$ per kilowatt-hour                                                         | <b>40.7</b>                            |
|                                                   | Irrigation                                               |                                                                                  | 26.1                                   |
| <b>Sum</b>                                        |                                                          |                                                                                  | <b>67</b>                              |
| <b>Materials &amp;<br/>depreciation<br/>costs</b> | Apple paper bag                                          |                                                                                  | 544.7                                  |
|                                                   | The bee reed pipe                                        |                                                                                  | 24.2                                   |
|                                                   | Gasoline for mower                                       |                                                                                  | 84.7                                   |
|                                                   | Mower depreciation costs                                 |                                                                                  | 69.6                                   |
|                                                   | Spray depreciation costs                                 |                                                                                  | 55.5                                   |
|                                                   | Water pump depreciation costs                            |                                                                                  | 34.8                                   |

|               |                   |                           |               |
|---------------|-------------------|---------------------------|---------------|
| <b>Sum</b>    |                   |                           | <b>814</b>    |
| <b>Others</b> | Orchard lease fee | 807 \$ year <sup>-1</sup> | <b>807</b>    |
| <b>Total</b>  |                   |                           | <b>12,114</b> |

| <b>Details of apple price of different quality level</b> |                                     |                                |
|----------------------------------------------------------|-------------------------------------|--------------------------------|
| Quality level*                                           | Conventional (\$ kg <sup>-1</sup> ) | Organic (\$ kg <sup>-1</sup> ) |
| 1                                                        | 0.97                                | 4.84                           |
| 2                                                        | 0.81                                | 3.87                           |
| 3                                                        | 0.65                                | 2.58                           |
| 4                                                        | 0.48                                | 0.48                           |
| 5                                                        | 0.32                                | 0.32                           |
| 6                                                        | 0.10                                | 0.10                           |

30 \*There are four levels for apple, we sold apple according to quality level.

31

32

33 **TableS4** Detailed list of cash forest inputs and outputs for Biodiversity Management  
 34 of Organic Farming (BMOF).

| <b>Details of Cash Forest Inputs</b>   |                                                           |                                                          |                                        |
|----------------------------------------|-----------------------------------------------------------|----------------------------------------------------------|----------------------------------------|
| <b>Content</b>                         | <b>Details</b>                                            | <b>Price Schedules</b>                                   | <b>Amount<br/>(\$ ha<sup>-1</sup>)</b> |
| <b>Materials</b>                       | Sapling cost                                              | 1.59 \$ plant <sup>-1</sup> , 900 plant ha <sup>-1</sup> | 1,431.0                                |
|                                        | Requirements for irrigation to government                 | 217.89 \$ ha <sup>-1</sup>                               | 219.9                                  |
| <b>Sum</b>                             |                                                           |                                                          | <b>1,651</b>                           |
| <b>Labor</b>                           | Tree planting                                             | 100 labor ha <sup>-1</sup>                               | 645.6                                  |
|                                        | Irrigation                                                | 9 labor ha <sup>-1</sup>                                 | 87.2                                   |
|                                        | Harvest                                                   | 200 labor ha <sup>-1</sup>                               | 1,291.2                                |
| <b>Sum</b>                             |                                                           |                                                          | <b>2,024</b>                           |
| <b>Total</b>                           |                                                           |                                                          | <b>3,675</b>                           |
| <b>Details of Cash Forest outputs*</b> |                                                           |                                                          |                                        |
| <b>Content</b>                         | <b>Price Schedules</b>                                    | <b>Amount(\$ ha<sup>-1</sup>)</b>                        |                                        |
| Woods                                  | 12.91 \$ plant <sup>-1</sup> , 900 plant ha <sup>-1</sup> | <b>11,621</b>                                            |                                        |

35 \*Cash forest needs 7-8 years to grown, so we only got the harvest one time in 2014.

**TableS5.** Detailed lists of cattle benefits from Hongyi Organic Farm during the experimental run (2007-2014).

| Years | Cattle capita | Cattle manure production(t ons) | Inputs(\$)    |                |                                |                          |                            |                  |                           |                  |                             |        | Outputs(\$) |        |
|-------|---------------|---------------------------------|---------------|----------------|--------------------------------|--------------------------|----------------------------|------------------|---------------------------|------------------|-----------------------------|--------|-------------|--------|
|       |               |                                 | Cattle house* | Fodder store** | Residues proceeding machine*** | Residues silage pool**** | Fodder mixing machine***** | Weighbridge***** | Young cattle buying costs | Breeding labor † | Residues proceeding labor § | Fodder | Beef        | Manure |
| 2007  | 50            | 263                             | 968           | 339            | 303                            | 796                      | 569                        | 520              | 29,052                    | 678              | 807                         | 5,897  | 53,262      | 1,271  |
| 2008  | 70            | 368                             | 968           | 339            | 303                            | 796                      | 569                        | 520              | 40,673                    | 678              | 1,130                       | 8,255  | 74,705      | 1,779  |
| 2009  | 100           | 525                             | 968           | 339            | 303                            | 796                      | 569                        | 520              | 72,630                    | 1,356            | 2,018                       | 11,793 | 159,786     | 2,542  |
| 2010  | 120           | 630                             | 968           | 339            | 303                            | 796                      | 569                        | 520              | 87,156                    | 1,356            | 2,421                       | 14,152 | 213,048     | 3,050  |
| 2011  | 140           | 735                             | 968           | 339            | 303                            | 796                      | 569                        | 520              | 152,523                   | 1,356            | 2,825                       | 16,510 | 248,556     | 3,559  |
| 2012  | 150           | 788                             | 968           | 339            | 303                            | 796                      | 569                        | 520              | 163,418                   | 1,356            | 3,632                       | 17,690 | 319,572     | 3,813  |
| 2013  | 180           | 945                             | 968           | 339            | 303                            | 796                      | 569                        | 520              | 261,468                   | 2,034            | 4,358                       | 21,227 | 415,444     | 4,576  |
| 2014  | 200           | 1050                            | 968           | 339            | 303                            | 796                      | 569                        | 520              | 290,520                   | 2,034            | 4,842                       | 23,586 | 461,604     | 5,084  |

\* Cow house cost was depreciation cost for 20 years, total inputs of house was 19,368 \$.

\*\* Fodder store was depreciation cost for 20 years, total inputs was 6,779 \$.

\*\*\* These inputs were depreciation cost for two residues proceeding machine. Total inputs was 3,034 \$ for 10 years.

\*\*\*\* Silage pool cost was depreciation cost for 20 years, total inputs was 15,922 \$.

\*\*\*\*\* Fodder mixing machine was depreciation cost for 10 years, total inputs was 5,689 \$.

\*\*\*\*\*Weighbridge was depreciation cost for 10 years, total inputs was 5,195 \$.

† Cattle breeding need average 7 month.

§ Residues proceeding needs 2.5 labor per head



**TableS6.** Detailed list of chicken and goose breeding inputs and outputs in Hongyi

Organic Farm during the experimental run (2007-2014).

| Years | chicken<br>capita | goose<br>capita | Inputs(\$)      |                  |                |          |       |        | Outputs(\$) |        |
|-------|-------------------|-----------------|-----------------|------------------|----------------|----------|-------|--------|-------------|--------|
|       |                   |                 | houses<br>cost* | young<br>chicken | young<br>goose | medicine | labor | fodder | chicken     | goose  |
| 2007  | 1,000             | 1,000           | 194             | 484              | 1,291          | 161      | 1,162 | 6,391  | 3,669       | 8,312  |
| 2008  | 2,000             | 2,000           | 194             | 968              | 2,582          | 323      | 1,162 | 8,522  | 7,522       | 16,947 |
| 2009  | 1,000             | 1,000           | 194             | 484              | 1,291          | 161      | 1,162 | 6,391  | 202**       | 9,038  |
| 2010  | 1,000             | 500             | 194             | 646              | 807            | 121      | 2,324 | 4,261  | 4,083       | 4,600  |
| 2011  | 1,000             | 1,000           | 194             | 646              | 1,614          | 161      | 2,324 | 6,391  | 4,567       | 9,958  |
| 2012  | 1,000             | 1,000           | 194             | 646              | 1,614          | 161      | 2,324 | 6,391  | 5,456       | 10,088 |
| 2013  | 1,000             | 1,000           | 194             | 646              | 1,937          | 161      | 3,486 | 6,391  | 5,508       | 10,588 |
| 2014  | 1,000             | 1,000           | 194             | 646              | 1,937          | 161      | 3,486 | 6,391  | 5,578       | 10,677 |

\*Houses cost is depreciation cost for 10 years, total inputs of house is 1,937 \$.

\*\*This year chicken dead due to diseases, only 150 chickens alive.

**TableS7.**Detailed price list used in different years' calculation.

| Years | Labor*               |                        | Young<br>cattle     | beef                | Young<br>chicken      | live<br>chicken     | Young<br>goose      | live<br>goose       |
|-------|----------------------|------------------------|---------------------|---------------------|-----------------------|---------------------|---------------------|---------------------|
|       | \$ day <sup>-1</sup> | \$ month <sup>-1</sup> | \$ kg <sup>-1</sup> | \$ kg <sup>-1</sup> | \$ head <sup>-1</sup> | \$ kg <sup>-1</sup> | \$ kg <sup>-1</sup> | \$ kg <sup>-1</sup> |
| 2007  | 6.46                 | 48.42                  | 2.58                | 1.94                | 0.48                  | 2.72                | 2.58                | 1.66                |
| 2008  | 6.46                 | 48.42                  | 2.58                | 1.94                | 0.48                  | 2.79                | 2.58                | 1.70                |
| 2009  | 8.07                 | 96.84                  | 3.23                | 2.91                | 0.48                  | 2.69                | 2.58                | 1.81                |
| 2010  | 8.07                 | 96.84                  | 3.23                | 3.23                | 0.48                  | 3.03                | 3.23                | 1.84                |
| 2011  | 8.07                 | 96.84                  | 4.84                | 3.23                | 0.65                  | 3.38                | 3.23                | 1.99                |
| 2012  | 9.68                 | 145.26                 | 4.84                | 3.87                | 0.65                  | 4.04                | 3.23                | 2.02                |
| 2013  | 9.68                 | 145.26                 | 6.46                | 4.20                | 0.65                  | 4.08                | 3.87                | 2.12                |
| 2014  | 9.68                 | 145.26                 | 6.46                | 4.20                | 0.65                  | 4.13                | 3.87                | 2.14                |

\* Two style of payment for labor force and the price varied in different years.

**TableS8.** Detailed list of crop yields and apple yields in Hongyi Organic Farm during the experimental run (2007-2014).

| Years | Crop yields of BMOF(kg)* |          | Crop yields of CF(kg) * |          | Apple yields in different quality levels (kg)** |         |         |         |         |        |        |
|-------|--------------------------|----------|-------------------------|----------|-------------------------------------------------|---------|---------|---------|---------|--------|--------|
|       | Wheat                    | Maize    | Wheat                   | Maize    | 1                                               | 2       | 3       | 4       | 5       | 6      | Total  |
| 2007  | 35,260.3                 | 41,002.5 | 53,298.8                | 55,235.2 | 461.3                                           | 922.5   | 1,845.0 | 3,228.8 | 2,306.3 | 461.3  | 9,225  |
| 2008  | 15,674.8                 | 27,388.7 | 52,673.6                | 53,133.4 | 474.8                                           | 949.5   | 1,899.0 | 3,323.3 | 2,373.8 | 474.8  | 9,495  |
| 2009  | 31,349.7                 | 28,349.2 | 54,081.7                | 56,378.3 | 510.8                                           | 1,021.5 | 2,043.0 | 3,575.3 | 2,553.8 | 510.8  | 10,215 |
| 2010  | 46,690.3                 | 54,817.4 | 55,233.5                | 62,190.1 | 492.8                                           | 985.5   | 1,971.0 | 3,449.3 | 2,463.8 | 492.78 | 9,855  |
| 2011  | 48,074.0                 | 47,653.8 | 52,826.0                | 55,571.2 | 495.0                                           | 990.0   | 1,980.0 | 3,465.0 | 2,475.0 | 495.0  | 9,900  |
| 2012  | 50,162.1                 | 53,204.6 | 53,091.9                | 54,901.8 | 402.8                                           | 805.5   | 1,611.0 | 2,819.3 | 2,013.8 | 402.8  | 8,055  |
| 2013  | 40,763.9                 | 35,417.7 | 57,857.5                | 51,622.3 | 427.5                                           | 855.0   | 1,710.0 | 2,992.5 | 2,137.5 | 427.5  | 8,550  |
| 2014  | 57,587.0                 | 68,269.1 | 64,027.7                | 92,787.6 | 452.3                                           | 904.5   | 1,809.0 | 3,165.8 | 2,261.3 | 452.3  | 9,045  |

\*Field land for BMOF crop was 6.7 ha, while land for CF crop was 8.7 ha

\*\*Apple orchard land was 0.3 ha.

**TableS9.** Labor inputs in the Hongyi Organic Farm during the eight-year run.

| Years | Crops (\$) | Orchard(\$) | Cattle(\$) | Chicken + goose(\$) | Cash forest(\$) | Total(\$) |
|-------|------------|-------------|------------|---------------------|-----------------|-----------|
| 2007  | 5,627      | 1,337       | 1485       | 1,162               | 282             | 9,893     |
| 2008  | 5,627      | 1,337       | 1808       | 1,162               | 0               | 9,934     |
| 2009  | 7,029      | 1,670       | 3374       | 1,162               | 0               | 13,235    |
| 2010  | 7,029      | 1,670       | 3777       | 2,324               | 0               | 14,800    |
| 2011  | 7,029      | 1,670       | 4181       | 2,324               | 0               | 15,204    |
| 2012  | 8,431      | 2,004       | 4988       | 2,324               | 0               | 17,747    |
| 2013  | 8,431      | 2,004       | 6392       | 3,486               | 0               | 20,313    |
| 2014  | 8,431      | 2,004       | 6876       | 3,486               | 774             | 21,571    |
